# Supplementary material for: Comparison of Phenols Content and Antioxidant Activity of Fruits from Different Maturity Stages of Ribes stenocarpum Maxim
Source: MDPI journal article supplement (doi:10.3390/molecules23123148), 2018-11-30
Supplement: s1 [file s1]

**Table 1** Numerical values of response obtained under the designed conditions taking the sample of NO.5 for example, and the contents of each phenols determined by HPLC as response values. (n = 3).

| Run | extraction time<br>( min ) | solvent<br>concentration (%) | ratio of sample<br>to solvent | total phenolic acid<br>content (mg/g) |
|-----|----------------------------|------------------------------|-------------------------------|---------------------------------------|
| 1   | 120.00                     | 75.00                        | 1:20                          | 69.32                                 |
| 2   | 90.00                      | 50.00                        | 1:20                          | 76.39                                 |
| 3   | 90.00                      | 25.00                        | 1:10                          | 45.32                                 |
| 4   | 90.00                      | 50.00                        | 1:20                          | 77.12                                 |
| 5   | 60.00                      | 25.00                        | 1:20                          | 47.68                                 |
| 6   | 90.00                      | 75.00                        | 1:30                          | 68.73                                 |
| 7   | 60.00                      | 75.00                        | 1:20                          | 65.12                                 |
| 8   | 90.00                      | 25.00                        | 1:30                          | 53.88                                 |
| 9   | 60.00                      | 50.00                        | 1:10                          | 49.37                                 |
| 10  | 60.00                      | 50.00                        | 1:30                          | 68.59                                 |
| 11  | 120.00                     | 25.00                        | 1:20                          | 56.92                                 |
| 12  | 90.00                      | 50.00                        | 1:20                          | 78.31                                 |
| 13  | 90.00                      | 75.00                        | 1:10                          | 51.12                                 |
| 14  | 90.00                      | 50.00                        | 1:20                          | 71.87                                 |
| 15  | 120.00                     | 50.00                        | 1:10                          | 51.33                                 |
| 16  | 90.00                      | 50.00                        | 1:20                          | 77.32                                 |
| 17  | 120.00                     | 50.00                        | 1:30                          | 71.32                                 |

**Table 2** Linear regression equation, correlation coefficients, LODs, LOQs, reproducibility of retention time and peak area, intra- and inter-day precisions.

| Analyte     | Regression<br>equation <sup>a</sup> | r      | LOD<br>( µ g/L) | LOQ<br>( µ g/L) | Instrument precision<br>(n=6) |           | Method precision<br>(n=3) |           |
|-------------|-------------------------------------|--------|-----------------|-----------------|-------------------------------|-----------|---------------------------|-----------|
|             |                                     |        |                 |                 | Intra-day                     | Inter-day | Intra-day                 | Inter-day |
| Gallic acid | y=0.853x-0.042                      | 0.9973 | 0.27            | 0.98            | 0.7                           | 1.2       | 1.3                       | 2.8       |

|                  |                |        |      |      |     |     |     |     |
|------------------|----------------|--------|------|------|-----|-----|-----|-----|
| Catechin         | y=4.017x-0.315 | 0.9981 | 0.32 | 0.95 | 0.6 | 0.9 | 1.4 | 2.7 |
| Chlorogenic acid | y=1.823x-0.032 | 0.9978 | 0.28 | 1.08 | 0.6 | 1.1 | 1.9 | 3.7 |
| Vanillic acid    | y=4.107x-0.057 | 0.9992 | 0.27 | 0.77 | 0.8 | 1.1 | 1.3 | 2.4 |
| Syringic acid    | y=7.154x-0.127 | 0.9983 | 0.29 | 0.83 | 0.8 | 1.0 | 1.6 | 3.2 |
| Coumaric acid    | y=9.987x-0.141 | 0.9976 | 0.16 | 0.61 | 0.9 | 1.4 | 1.7 | 3.5 |
| Ferulic acid     | y=7.357x-0.068 | 0.9985 | 0.21 | 0.72 | 0.8 | 1.3 | 1.6 | 3.2 |
| Rosemary acid    | y=0.669x-0.013 | 0.9969 | 0.30 | 1.01 | 0.6 | 1.1 | 1.3 | 2.5 |
| Quercetin acid   | y=6.830x-0.063 | 0.9982 | 0.10 | 0.32 | 0.7 | 1.1 | 1.3 | 2.7 |

**Table 3** Main content of phenols of RSM fruits from different maturity stages ( mean±SD, mg /g, n=3).

| Samples          | 1          | 2          | 3          | 4          | 5          | 6          | 7          |
|------------------|------------|------------|------------|------------|------------|------------|------------|
| Gallic acid      | 9.76±1.20  | 8.53±1.56  | 14.77±1.98 | 11.52±1.88 | 10.13±1.71 | 10.32±1.80 | 7.02±1.05  |
| Catechin         | 19.71±2.35 | 17.62±2.13 | 16.15±2.01 | 14.10±1.97 | 13.33±1.92 | 11.09±1.73 | 8.59±1.30  |
| Chlorogenic acid | 14.21±1.97 | 13.77±1.93 | 12.17±1.82 | 13.76±1.95 | 9.49±1.59  | 5.32±1.07  | 2.15±0.59  |
| Vanillic acid    | 1.35±0.23  | 1.97±0.28  | 3.11±0.47  | 4.53±0.60  | 5.18±0.81  | 5.03±0.79  | 4.81±0.71  |
| Syringic acid    | 2.15±0.46  | 5.19±0.98  | 7.17±1.21  | 11.36±1.72 | 7.30±1.38  | 6.09±1.18  | 3.12±0.46  |
| Coumaric acid    | 23.07±2.98 | 18.65±1.92 | 14.73±1.61 | 12.90±1.42 | 10.00±1.18 | 13.19±1.47 | 15.77±1.72 |
| Ferulic acid     | 24.17±2.73 | 16.98±1.77 | 10.52±0.95 | 5.65±0.56  | 3.53±0.65  | 3.10±0.43  | 1.72±0.29  |
| Rosemary acid    | -          | 1.03±0.27  | 1.79±0.38  | 3.39±0.76  | 5.48±0.89  | 9.16±1.32  | 9.55±1.28  |
| Quercetin acid   | -          | 2.15±0.31  | 2.97±0.60  | 4.13±0.87  | 6.40±0.94  | 7.11±1.54  | 11.39±1.83 |

1. Data are expressed as mean value  $\pm$  S.D.

2. -Not detected.

**Table 4.** Samples of RSM fruits from different stages of maturity

| Codes        | Sample 1        | Sample 2        | Sample 3          | Sample 4           | Sample 5           | Sample 6        | Sample 7         |
|--------------|-----------------|-----------------|-------------------|--------------------|--------------------|-----------------|------------------|
| Picking time | August 10, 2017 | August 20, 2017 | September 1, 2017 | September 10, 2017 | September 20, 2017 | October 1, 2017 | October 10, 2017 |

**Table 5.** Determination of DPPH radical scavenging ability

| $\mu\text{g} \cdot \text{mL}^{-1}$ | Sample 1 | Sample 2 | Sample 3 | Sample 4 | Sample 5 | Sample 6 | Sample 7 | Vc     |
|------------------------------------|----------|----------|----------|----------|----------|----------|----------|--------|
| 20                                 | 21.21%   | 19.32%   | 19.21%   | 18.15%   | 11.57%   | 13.76%   | 13.11%   | 20.36% |
| 40                                 | 40.15%   | 31.57%   | 30.35%   | 28.72%   | 19.83%   | 22.19%   | 20.72%   | 32.58% |
| 60                                 | 56.73%   | 47.62%   | 43.44%   | 45.41%   | 31.65%   | 33.85%   | 32.07%   | 48.39% |
| 80                                 | 59.34%   | 52.33%   | 49.73%   | 47.28%   | 39.77%   | 41.07%   | 43.19%   | 51.29% |
| 100                                | 67.21%   | 57.30%   | 57.19%   | 59.76%   | 43.52%   | 47.79%   | 46.83%   | 58.39% |

**Table 6.** Determination of ABTS radical scavenging ability

| $\mu\text{g} \cdot \text{mL}^{-1}$ | Sample 1 | Sample 2 | Sample 3 | Sample 4 | Sample 5 | Sample 6 | Sample 7 | Vc     |
|------------------------------------|----------|----------|----------|----------|----------|----------|----------|--------|
| 20                                 | 15.32%   | 13.76%   | 12.81%   | 14.10%   | 9.35%    | 11.08%   | 11.33%   | 14.33% |
| 40                                 | 30.11%   | 25.37%   | 21.97%   | 24.09%   | 17.62%   | 18.92%   | 19.02%   | 25.92% |
| 60                                 | 41.35%   | 36.19%   | 33.21%   | 36.05%   | 27.19%   | 29.30%   | 28.19%   | 36.81% |
| 80                                 | 45.28%   | 39.80%   | 35.18%   | 38.83%   | 30.03%   | 31.86%   | 33.53%   | 39.72% |
| 100                                | 52.79%   | 44.94%   | 43.27%   | 46.76%   | 34.18%   | 37.60%   | 36.69%   | 48.39% |

**Table 7.** Effect of phenols from RSM fruits on survival rate of HepG2 cells

| $\mu\text{g} \cdot \text{mL}^{-1}$ | Sample<br>1 | Sample<br>2 | Sample<br>3 | Sample<br>4 | Sample<br>5 | Sample<br>6 | Sample<br>7 |
|------------------------------------|-------------|-------------|-------------|-------------|-------------|-------------|-------------|
| 20                                 | 101%        | 92%         | 93%         | 105%        | 103%        | 101%        | 96%         |
| 40                                 | 97%         | 95%         | 100%        | 97%         | 95%         | 97%         | 99%         |
| 60                                 | 101%        | 102%        | 95%         | 101%        | 97%         | 95%         | 93%         |
| 80                                 | 93%         | 97%         | 97%         | 96%         | 101%        | 103%        | 97%         |
| 100                                | 98%         | 99%         | 103%        | 97%         | 99%         | 98%         | 92%         |

**Table 8.** Scavenging abilities of phenols from RSM fruits against the intracellular ROS.

| $\mu\text{g} \cdot \text{mL}^{-1}$ | Sample<br>1 | Sample<br>2 | Sample<br>3 | Sample<br>4 | Sample<br>5 | Sample<br>6 | Sample<br>7 | Vc     |
|------------------------------------|-------------|-------------|-------------|-------------|-------------|-------------|-------------|--------|
| 20                                 | 21.57%      | 15.51%      | 13.82%      | 15.80%      | 10.10%      | 12.06%      | 12.36%      | 16.29% |
| 40                                 | 26.49%      | 21.39%      | 20.97%      | 23.91%      | 15.72%      | 18.15%      | 19.87%      | 23.38% |
| 60                                 | 32.86%      | 27.68%      | 28.15%      | 27.19%      | 20.35%      | 22.75%      | 23.69%      | 29.12% |
| 80                                 | 42.91%      | 35.89%      | 37.07%      | 39.11%      | 29.07%      | 33.61%      | 30.96%      | 39.29% |
| 100                                | 57.63%      | 45.37%      | 47.32%      | 46.30%      | 37.98%      | 40.87%      | 39.30%      | 50.83% |
